# Supplementary material for: Automated Photoreceptor Cell Identification on Nonconfocal Adaptive Optics Images Using Multiscale Circular Voting
Source: PubMed Central journal article supplement — Invest Ophthalmol Vis Sci. 2017 Sep;58(11):4477–89. doi: 10.1167/iovs.16-21003 (PMC5586244; doi:10.1167/iovs.16-21003), 2017-09
Supplement: iovs-58-10-40_s01.pdf [file iovs-58-10-40_s01.pdf]

## Supplemental Figures

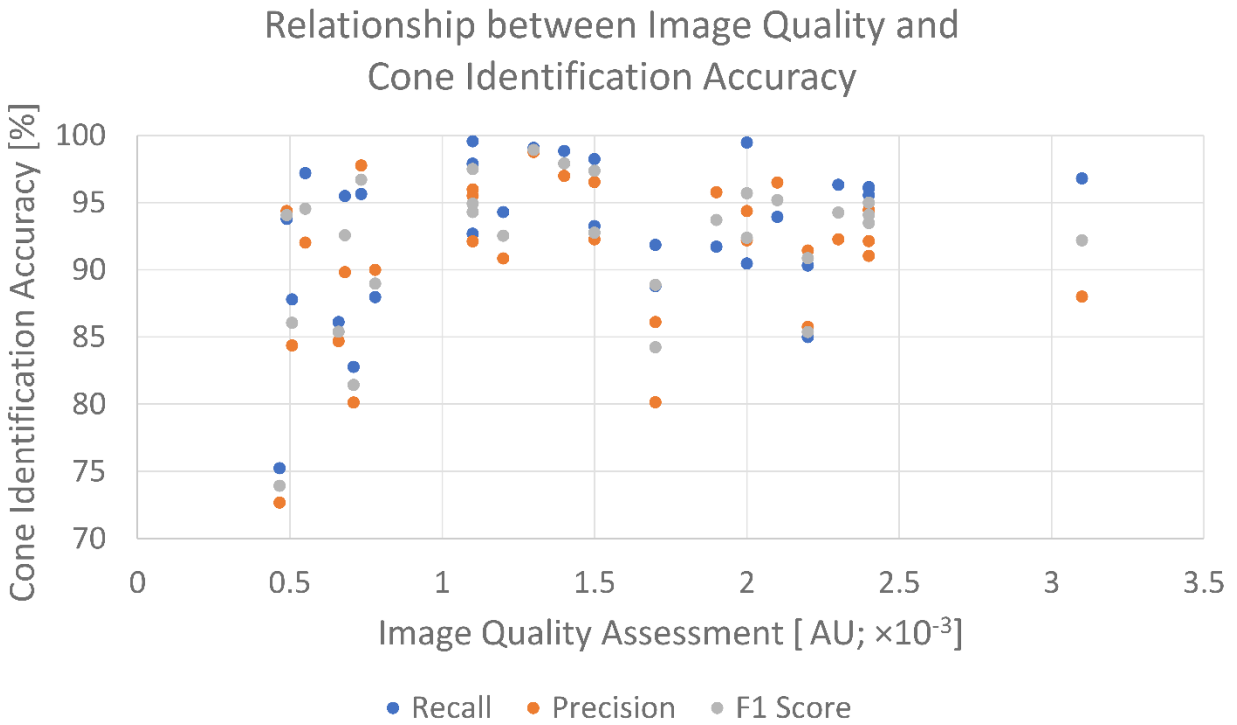

**Supplemental Figure 1.** Correlation between image quality assessment and cone identification accuracy. The method for image quality assessment is based on the assumption that high-quality split detection images should have strong image contrast along the horizontal direction, resulting in a higher standard deviation of image entropy values computed along different directions. Assessment values range from 0 to 1. Images with assessment values less than  $1.0 \times 10^{-3}$  are likely to result in poorer identification accuracies.

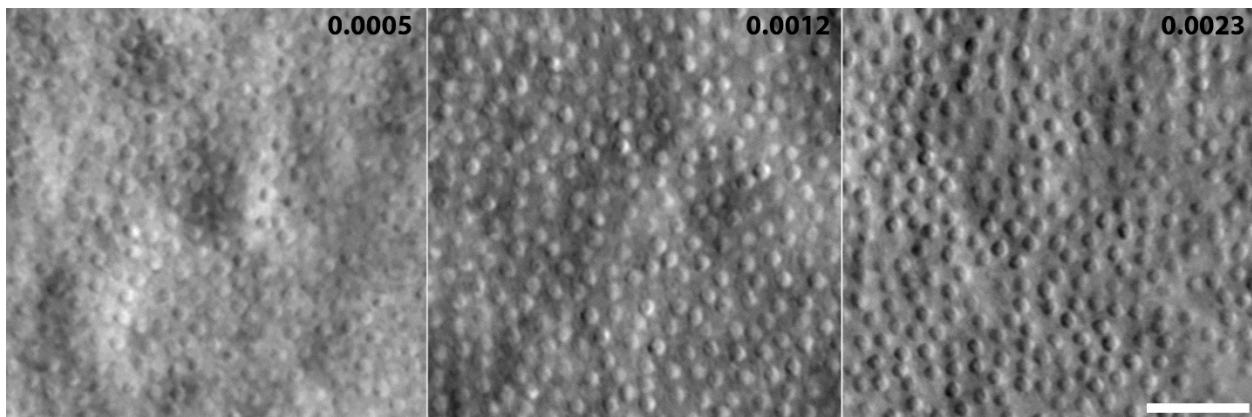

**Supplemental Figure 2.** Examples of images with different image quality assessment scores (marked in the upper right hand corner). Scale bar, 50  $\mu\text{m}$ .
